# Supplementary material
Source: PubMed Central journal article supplement (PMC5885219)
Supplement: jamaoncol-4-537-s002.pdf [file jamaoncol-4-537-s002.pdf]

## Supplementary Online Content

Petrylak DP, Powles T, Bellmunt J, et al. Atezolizumab (MPDL3280A) monotherapy in metastatic urothelial cancer: long-term outcomes from a phase 1 study. *JAMA Oncol*. Published online February 8, 2018. doi:10.1001/jamaoncol.2017.5440

**eTable 1.** Baseline Demographics and Clinical Characteristics of Patients With mUC (N = 95)

**eTable 2.** Summary of AEs in Patients < 65 Years and ≥ 65 Years

**eTable 3.** Treatment-related AEs Occurring Beyond 1 Year Following Initiation of Atezolizumab

**eFigure.** Progression-Free Survival

This supplementary material has been provided by the authors to give readers additional information about their work.

**eTable 1. Baseline Demographics and Clinical Characteristics of Patients With mUC (N = 95)**

| Characteristic                                           | No. of Patients (%) |
|----------------------------------------------------------|---------------------|
| Age, years                                               |                     |
| Median                                                   | 66                  |
| Range                                                    | 36-89               |
| ≥ 65 years                                               | 56 (59)             |
| Sex                                                      |                     |
| Male                                                     | 72 (76)             |
| ECOG PS                                                  |                     |
| 0                                                        | 37 (39)             |
| 1                                                        | 58 (61)             |
| Primary tumor site: bladder                              | 76 (80)             |
| Metastatic sites                                         |                     |
| Visceral                                                 | 74 (78)             |
| Liver                                                    | 35 (37)             |
| Hemoglobin < 10 g/dL                                     | 18 (19)             |
| PD-L1 IC score <sup>a</sup>                              |                     |
| IC0                                                      | 16 (17)             |
| IC1                                                      | 28 (30)             |
| IC2                                                      | 37 (39)             |
| IC3                                                      | 13 (14)             |
| Prior cystectomy or nephroureterectomy                   | 58 (61)             |
| Prior BCG                                                | 27 (28)             |
| ≤ 3 months from prior chemotherapy <sup>b</sup>          | 39 (42)             |
| Current line of therapy                                  |                     |
| 1                                                        | 9 (9)               |
| 2                                                        | 41 (43)             |
| ≥ 3                                                      | 45 (47)             |
| Prior platinum-based chemotherapy for metastatic disease | 68 (72)             |

Abbreviations: BCG, bacille Calmette-Guérin; ECOG, Eastern Cooperative Oncology Group; IC, tumor-infiltrating immune cells; PD-L1, programmed death-ligand 1; PS, performance status.

Data cutoff: December 31, 2016; median follow-up, 38 months.

<sup>a</sup> Based on PD-L1 scoring at baseline. Includes mixed population of patients enrolled based on PD-L1 selection and nonselected all-comers. One patient had unknown PD-L1 status.

<sup>b</sup> n = 93.

**eTable 2. Summary of AEs in Patients < 65 Years and ≥ 65 Years**

|                                                           | Age                    |                        |
|-----------------------------------------------------------|------------------------|------------------------|
|                                                           | < 65 years<br>(n = 39) | ≥ 65 years<br>(n = 56) |
| All AEs, n (%)                                            | 39 (100)               | 54 (96)                |
| SAEs                                                      | 15 (39)                | 34 (61)                |
| TRAEs                                                     | 25 (64)                | 39 (70)                |
| AEs leading to treatment withdrawal, n (%)                | 0                      | 4 (7)                  |
| SAEs leading to treatment withdrawal                      | 0                      | 3 (5)                  |
| TRAEs leading to treatment withdrawal                     | 0                      | 1 (2)                  |
| AEs leading to dose modification (or interruption), n (%) | 12 (31)                | 13 (23)                |
| SAEs leading to dose modification (or interruption)       | 9 (23)                 | 9 (16)                 |
| TRAEs leading to dose modification (or interruption)      | 2 (5)                  | 3 (5)                  |
| AEs leading to death                                      | 1 (3) <sup>a</sup>     | 0                      |

Abbreviations: AE, adverse event; SAE, serious adverse event; TRAE, treatment-related adverse event.

Data cutoff: December 31, 2016; median follow-up, 38 months.

<sup>a</sup>One patient had an overdose resulting in death.

**eTable 3. Treatment-related AEs Occurring Beyond 1 Year Following Initiation of Atezolizumab**

| Treatment-Related AE       | No. of Events (%) (n = 37) <sup>a</sup> |                   |
|----------------------------|-----------------------------------------|-------------------|
|                            | Any grade, n (%)                        | Grades 3-4, n (%) |
| Any AE                     | 15 (41)                                 | 2 (5)             |
| Pruritus                   | 3 (8)                                   | 0                 |
| Asthenia                   | 2 (5)                                   | 0                 |
| Rash                       | 2 (5)                                   | 0                 |
| Diarrhea                   | 2 (5)                                   | 0                 |
| Arthralgia                 | 2 (5)                                   | 0                 |
| Hypothyroidism             | 2 (5)                                   | 0                 |
| Dry skin                   | 2 (5)                                   | 0                 |
| Myalgia                    | 2 (5)                                   | 0                 |
| Raynaud's phenomenon       | 2 (5)                                   | 0                 |
| Rash maculo-papular        | 1 (3)                                   | 1 (3)             |
| Neutropenia                | 1 (3)                                   | 1 (3)             |
| Fatigue                    | 1 (3)                                   | 0                 |
| Nausea                     | 1 (3)                                   | 0                 |
| Pyrexia                    | 1 (3)                                   | 0                 |
| ALT increased              | 1 (3)                                   | 0                 |
| AST increased              | 1 (3)                                   | 0                 |
| Influenza-like illness     | 1 (3)                                   | 0                 |
| Cough                      | 1 (3)                                   | 0                 |
| Blood phosphorus decreased | 1 (3)                                   | 0                 |
| Eosinophilia               | 1 (3)                                   | 0                 |
| Erythema                   | 1 (3)                                   | 0                 |
| Lichen planus              | 1 (3)                                   | 0                 |
| Dyspnea                    | 1 (3)                                   | 0                 |
| Epistaxis                  | 1 (3)                                   | 0                 |
| Pneumonitis                | 1 (3)                                   | 0                 |
| Rhinitis                   | 1 (3)                                   | 0                 |
| Urinary tract infection    | 1 (3)                                   | 0                 |
| Hypercalcemia              | 1 (3)                                   | 0                 |
| Seborrheic keratosis       | 1 (3)                                   | 0                 |
| Headache                   | 1 (3)                                   | 0                 |

<sup>a</sup> Includes all treatment-related adverse events in patients with  $\geq 1$  year of follow-up from first dose of atezolizumab (n = 37).

**eFigure. Progression-Free Survival**

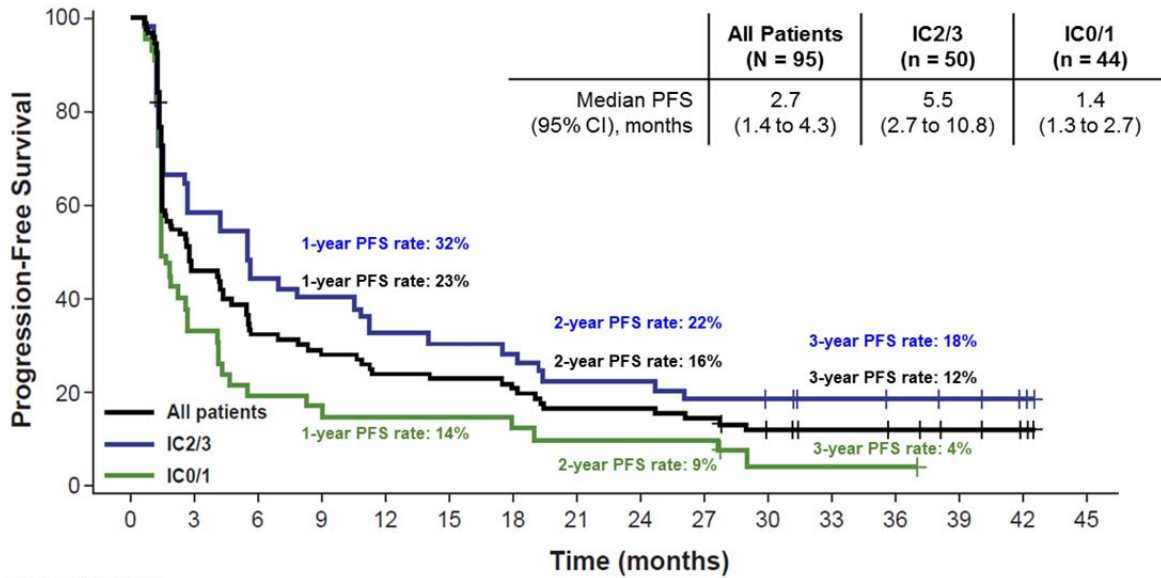

| No. of Patients at Risk |    | 0  | 3  | 6  | 9  | 12 | 15 | 18 | 21 | 24 | 27 | 30 | 33 | 36 | 39 | 42 | 45 |
|-------------------------|----|----|----|----|----|----|----|----|----|----|----|----|----|----|----|----|----|
| All patients            | 95 | 43 | 30 | 26 | 22 | 21 | 19 | 15 | 15 | 13 | 9  | 7  | 6  | 4  | 2  |    |    |
| IC2/3                   | 50 | 29 | 22 | 20 | 16 | 15 | 14 | 11 | 11 | 9  | 8  | 6  | 5  | 4  | 2  |    |    |
| IC0/1                   | 44 | 14 | 8  | 6  | 6  | 6  | 5  | 4  | 4  | 4  | 1  | 1  | 1  |    |    |    |    |

Kaplan-Meier estimates of progression-free survival (PFS) in all patients and based on programmed death-ligand 1 (PD-L1) status on tumor-infiltrating immune cells (IC). Sensor marks are indicated by a plus (+) symbol. One patient with unknown PD-L1 IC IHC status is included in the all-patient curve.
